# Supplementary material
Source: Springer Nature journal article supplement (https://www.springermedizin.de/resource/supplementary/13229_2009_3_MOESM3_ESM.pdf/9675978)

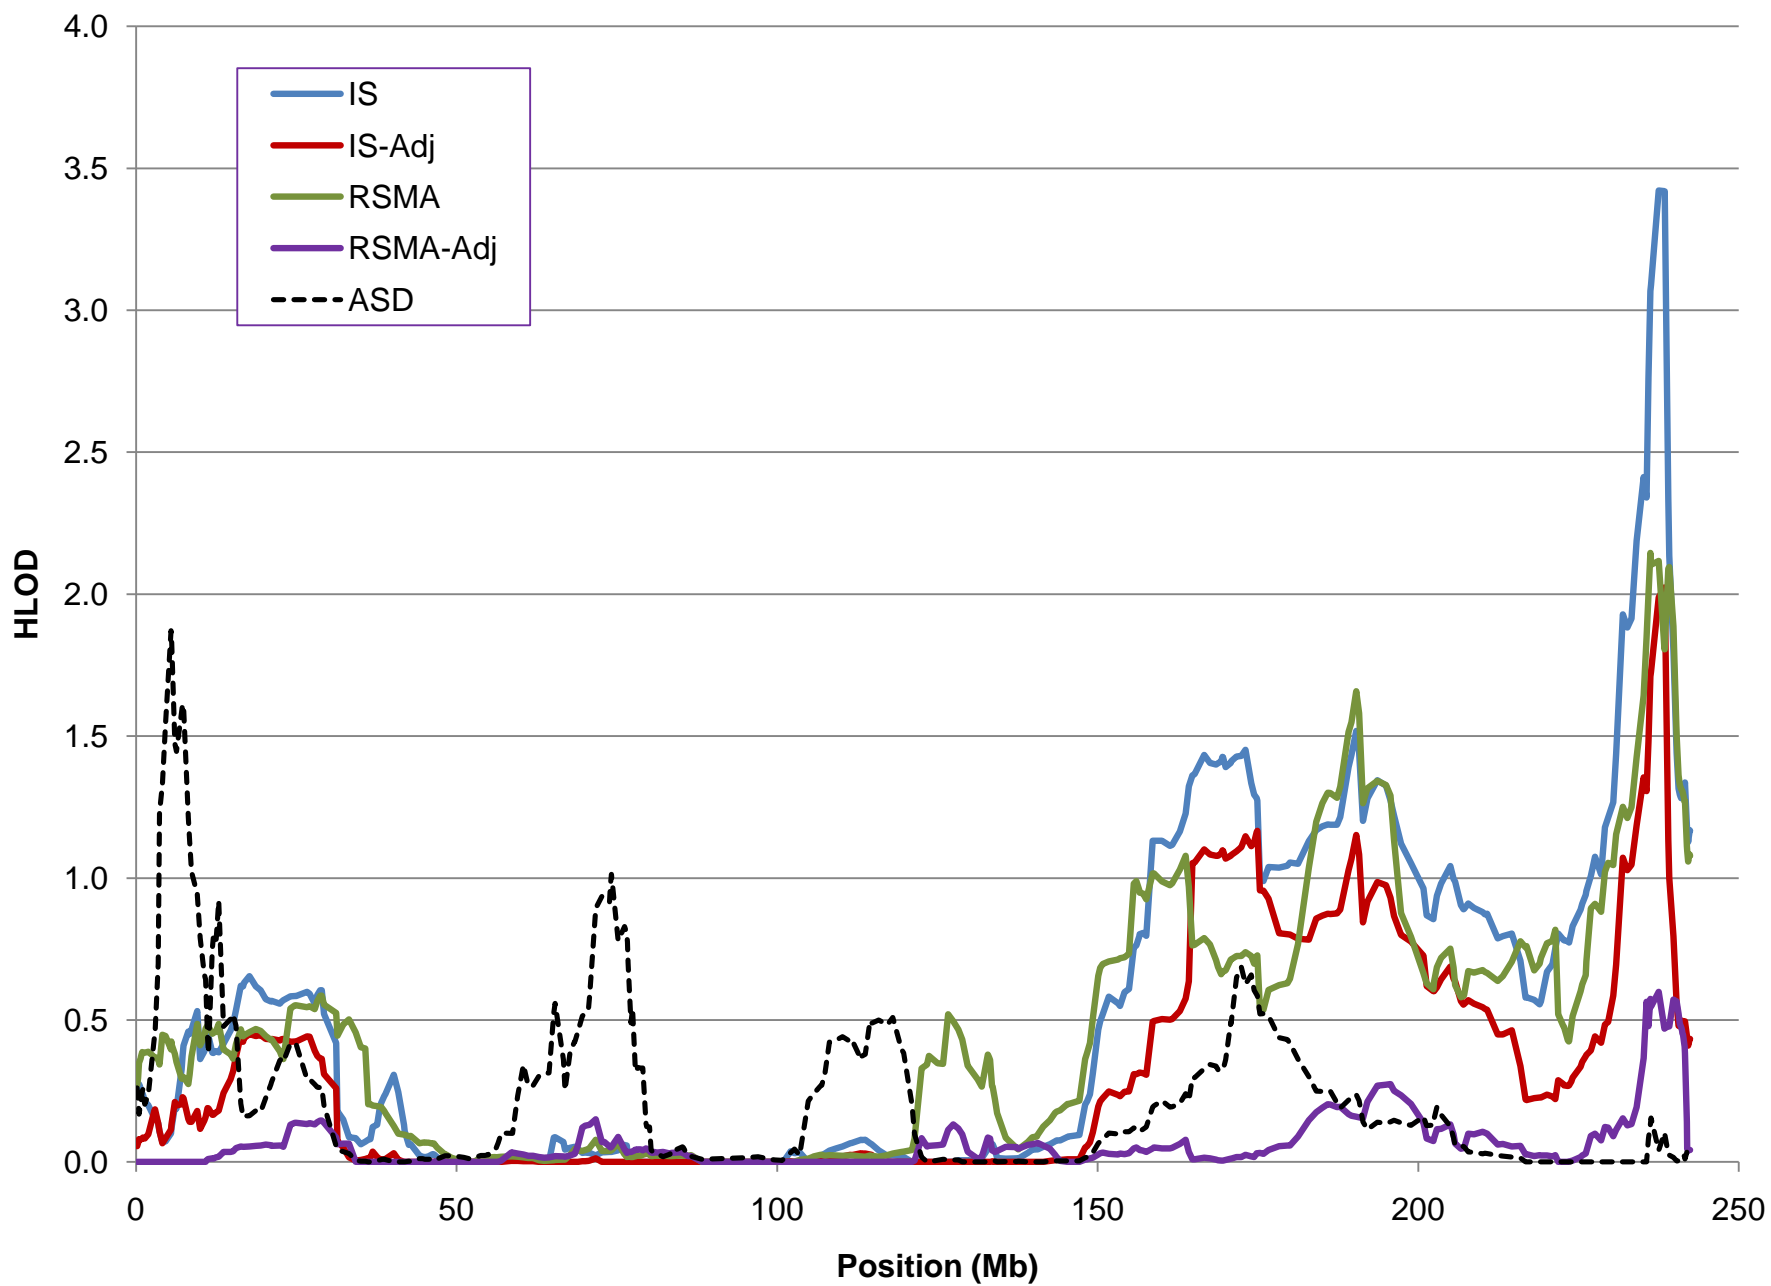

Supplement: MOESM3 [file 9675978]
